# Supplementary material for: Synthesis and properties of a dually cleavable graft copolymer comprising pendant acetal linkages
Source: Royal Society of Chemistry journal article supplement (doi:10.1039/c3py01049j), 2013-11-08
Supplement: c3py01049j.pdf [file c3py01049j.pdf]

## Supporting Information

# Synthesis and properties of a dually cleavable graft copolymer comprising pendant acetal linkages

Ke Miao, Wei Shao, Huanhuan Liu and Youliang Zhao\*

Jiangsu Key Laboratory of Advanced Functional Polymer Design and Application, Department of Polymer Science and Engineering, College of Chemistry, Chemical Engineering and Materials Science, Soochow University, Suzhou 215123, China

**Table S1.** Results for synthesis of normal (PHP, run 1) and disulfide-linked (SPHP, run 2) poly(HEMA-*co*-PEGMEMA) copolymers by RAFT copolymerization of HEMA ( $M_1$ ) and PEGMEMA ( $M_2$ ) and normal (CP, runs 3) and disulfide-linked (SCP, run 4) poly(PEG-*co*-PCL) comblike copolymers by CL polymerization using various macroinitiators (MI)<sup>a</sup>

| run | sample | CTA / MI | T (°C) | t (h) | C% <sup>b</sup> | $M_n^c$ | PDI <sup>c</sup> | $M_{n,NMR}^d$ | DP <sub>1</sub> <sup>d</sup> | DP <sub>2</sub> <sup>d</sup> | DP <sub>PCL</sub> <sup>d</sup> | $f_{w,PCL}^e$ |
|-----|--------|----------|--------|-------|-----------------|---------|------------------|---------------|------------------------------|------------------------------|--------------------------------|---------------|
| 1   | PHP    | 4-CPDB   | 60     | 8     | 39.4            | 5500    | 1.11             | 5050          | 8.2                          | 7.8                          | —                              | —             |
| 2   | SPHP   | S-CPDB   | 60     | 5     | 33.8            | 7460    | 1.10             | 7730          | 12.2                         | 11.5                         | —                              | —             |
| 3   | CP     | PHP      | 90     | 20    | 93.6            | 27100   | 1.12             | 26900         | 8.2                          | 7.8                          | 23.4                           | 0.813         |
| 4   | SCP    | SPHP     | 90     | 20    | 96.0            | 49900   | 1.12             | 48900         | 12.2                         | 11.5                         | 29.6                           | 0.842         |

<sup>a</sup> Reaction conditions:  $[M_1]_0:[M_2]_0:(f[CTA]_0):[AIBN]_0 = x:x:1:0.2$ ,  $f = 1$  (4-CPDB) or 2 (S-CPDB),  $x = 20$  (run 1) or 30 (run 2),  $[M_1]_0 = 1.0 \text{ mol L}^{-1}$ , in DMF (runs 1 and 2);  $[CL]_0:[OH]_0:[Sn(Oct)_2]_0 = y:1:0.2$ ,  $y = 25$  (run 3) or 30 (run 4),  $[CL]_0 = 2.0 \text{ mol L}^{-1}$ , in toluene (runs 3 and 4). <sup>b</sup> Total monomer conversion determined by <sup>1</sup>H NMR analysis. <sup>c</sup> Number-average molecular weight ( $\text{g mol}^{-1}$ ) and polydispersity estimated by GPC ( $M_{n,GPC}$ , runs 1 and 2) or determined by GPC-MALLS ( $M_{n,LS}$ , runs 3 and 4). <sup>d</sup> Number-average molecular weight ( $M_{n,NMR}$ ,  $\text{g mol}^{-1}$ ) and degree of polymerization (DP) determined by <sup>1</sup>H NMR analysis. <sup>e</sup> Weight percent of PCL in copolymer determined by <sup>1</sup>H NMR analysis,  $f_{w,PCL} = DP_1 \times DP_{PCL} / M_{n,NMR}$ .

**Table S2.** Results for synthesis of acid-cleavable (ACG) and disulfide-linked acid-cleavable (SACG) poly(PEG-co-PCL)-*graft*-MVPEG graft copolymers via adductive reaction between poly(PEG-co-PCL) and MVPEG<sup>a</sup>

| run | sample | precursor | yield | $M_{n,th}^b$ | $M_{n,LS}^c$ | PDI <sup>c</sup> | $M_{n,NMR}^d$ | DP <sub>1</sub> <sup>e</sup> | DP <sub>2</sub> <sup>e</sup> | DP <sub>PCL</sub> <sup>e</sup> | $f_{w,PCL}^e$ |
|-----|--------|-----------|-------|--------------|--------------|------------------|---------------|------------------------------|------------------------------|--------------------------------|---------------|
| 1   | ACG    | CP        | 0.96  | 33600        | 34200        | 1.14             | 33600         | 8.2                          | 7.8                          | 23.4                           | 0.647         |
| 2   | SACG   | SCP       | 0.98  | 58900        | 59600        | 1.08             | 58800         | 12.2                         | 11.5                         | 29.6                           | 0.700         |

<sup>a</sup> Reaction conditions: [MVPEG]<sub>0</sub>: [OH]<sub>0</sub>: [PPTS]<sub>0</sub> = 2:1:0.2,  $W_{polymer} \cdot V_{DMF} = 0.30 \text{ g mL}^{-1}$ , in DMF at 30 °C for 60 h. <sup>b</sup> Theoretical molecular weight ( $\text{g mol}^{-1}$ ),  $M_{n,th} = M_{n,NMR}(\text{precursor}) + DP_1 \times M_n(\text{MVPEG})$ . <sup>c</sup> Determined by GPC-MALLS. <sup>d</sup> Determined by <sup>1</sup>H NMR analysis. <sup>e</sup> Polymerization degree of HEMA (DP<sub>1</sub>), PEGMEMA (DP<sub>2</sub>), PCL (DP<sub>PCL</sub>) and weight percent of PCL in copolymer ( $f_{w,PCL}$ ) determined by <sup>1</sup>H NMR analysis.

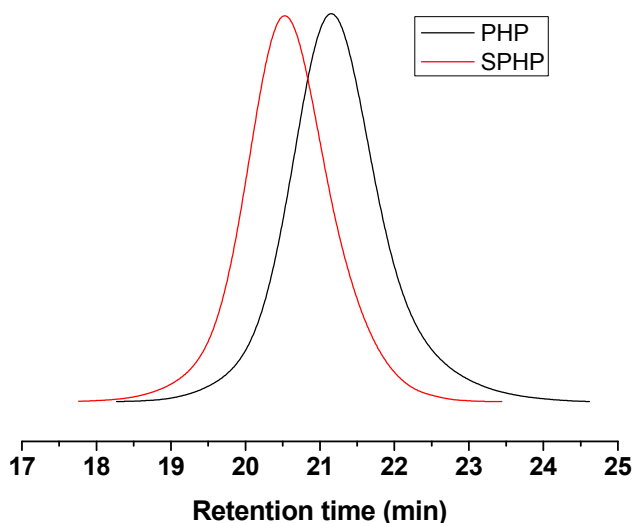

**Fig. S1** GPC traces of PHP and SPHP.

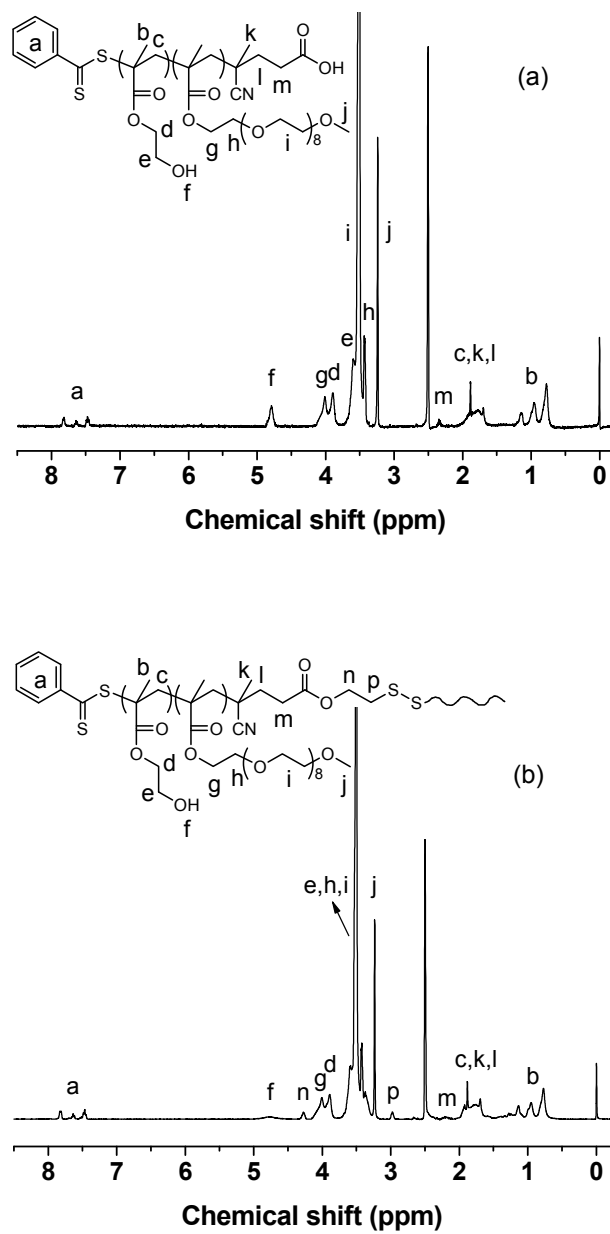

**Fig. S2**  $^1\text{H}$  NMR spectra of PHP (a) and SPHP (b) in  $\text{DMSO-}d_6$ .

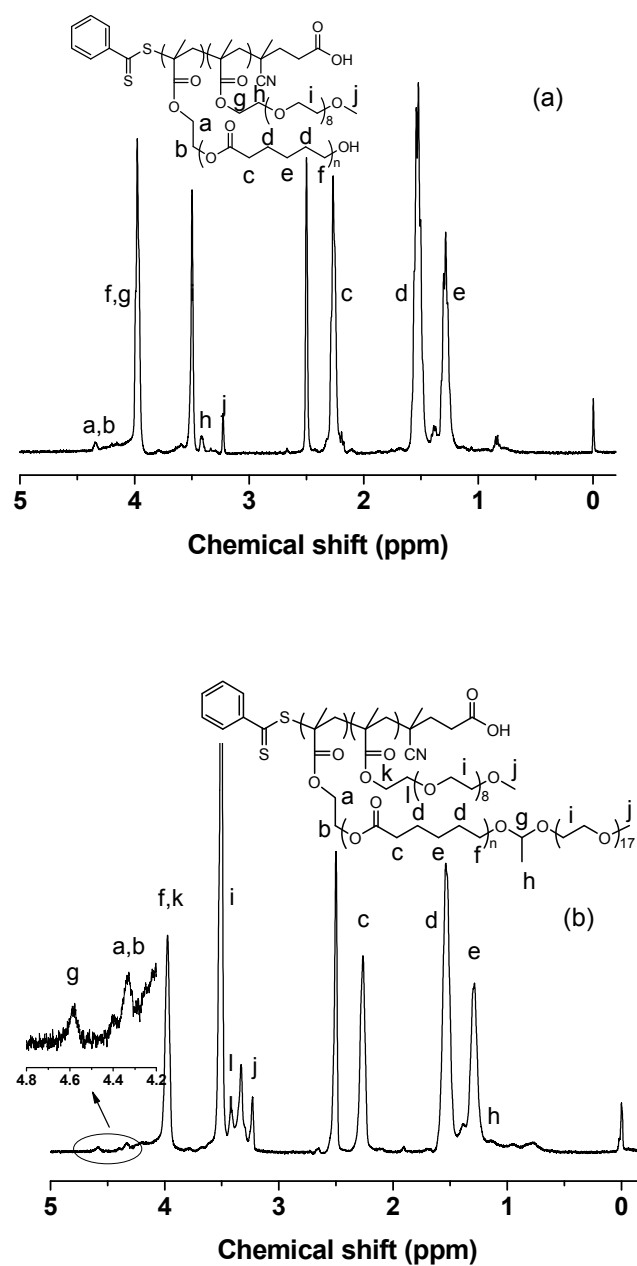

Fig. S3  $^1\text{H}$  NMR spectra of CP (a) and ACG (b) in  $\text{DMSO-}d_6$ .

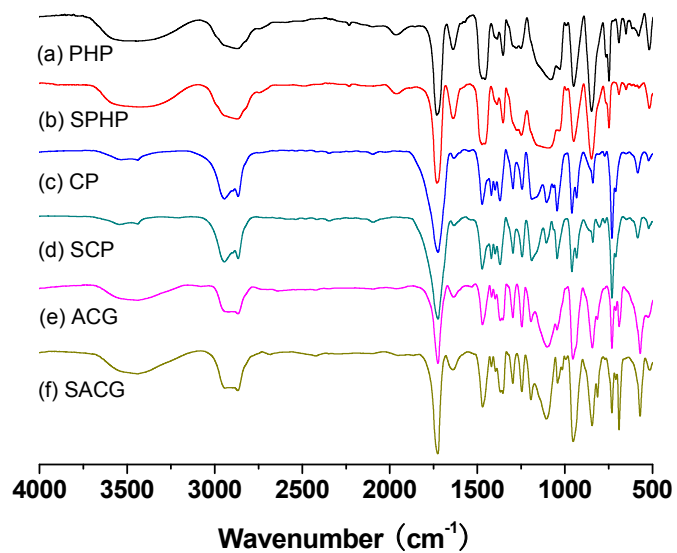

**Fig. S4** IR spectra of various copolymers.

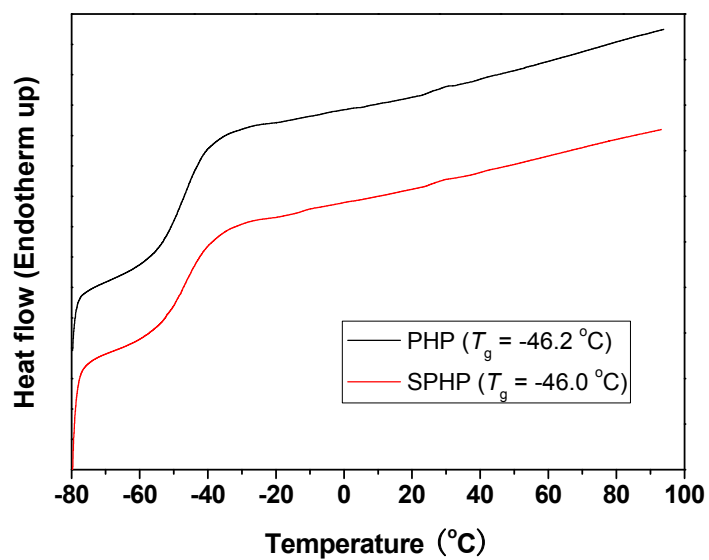

**Fig. S5** DSC curves of PHP and SPHP.

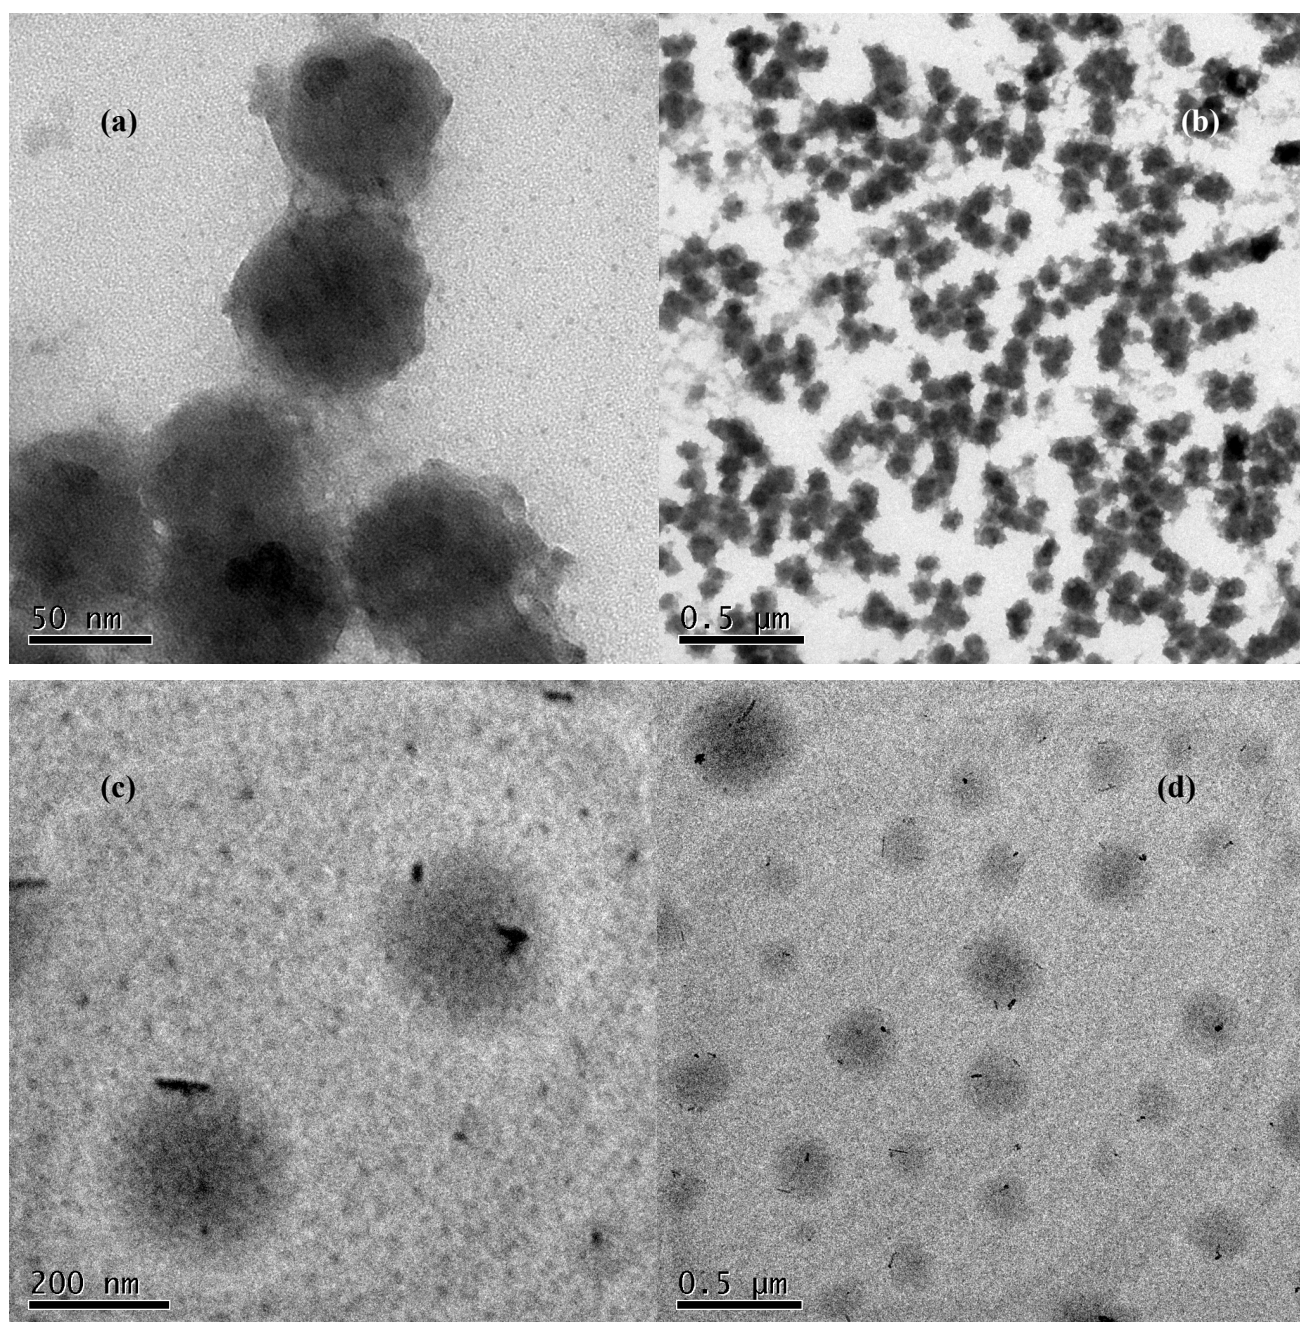

**Fig. S6** Typical TEM images of copolymer micelles formed by SCP (a, b) and aggregates involving large compound micelles formed by SACG (c, d) in aqueous solution ( $c = 0.50 \text{ mg mL}^{-1}$ ).

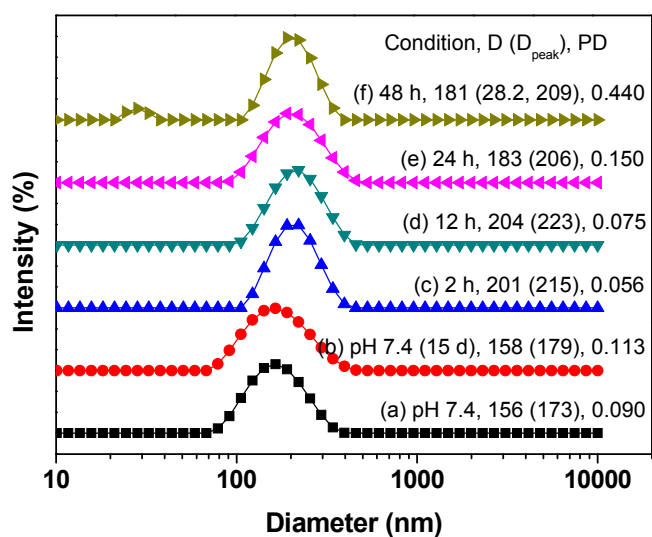

**Fig. S7** DLS plots of SACG aggregates ( $c = 0.50 \text{ mg mL}^{-1}$ ) in PBS solution (50 mM) at 37 °C: a and b, pH 7.4; c-f, pH 5.0.

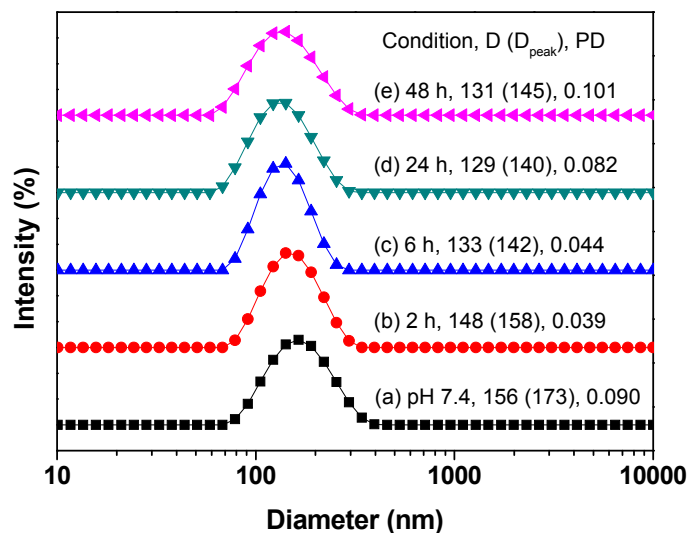

**Fig. S8** DLS plots of SACG aggregates ( $c = 0.50 \text{ mg mL}^{-1}$ ) in PBS solution (pH 7.4, 50 mM) at 37 °C: a, no DTT; b-e, 10 mM DTT.

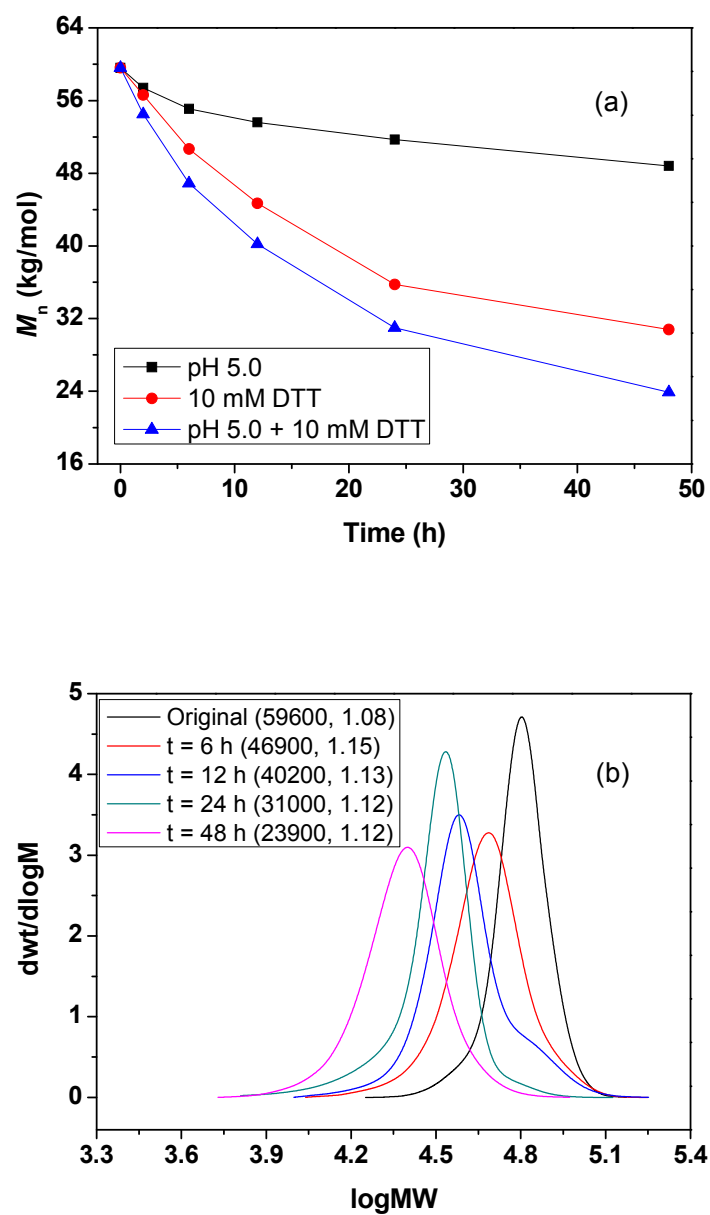

**Fig. S9** Dependence of molecular weight of cleaved SACG copolymer upon external stimuli in PBS solution (50 mM) at 37 °C on time (a) and typical GPC traces of cleaved copolymers obtained at different times (b).
